# Supplementary material for: Size-dependent catalytic activity for CO oxidation over sub-nano-Au clusters
Source: Royal Society of Chemistry journal article supplement (doi:10.1039/d4nr02705a), 2024-01-01
Supplement: d4nr02705a1.pdf [file d4nr02705a1.pdf]

## Supplementary Information

# Size-dependent catalytic activity for CO oxidation over sub-nano Au clusters

Yuqi Wang<sup>a</sup>, Haoxiang Xu<sup>a\*</sup>, Jiqin Zhu<sup>b\*\*</sup> and Daojian Cheng<sup>a\*</sup>

<sup>a</sup>State Key Laboratory of Organic-Inorganic Composites, Beijing Key Laboratory of Energy Environmental Catalysis, Beijing University of Chemical Technology, Beijing 100029, People's Republic of China

<sup>b</sup>State Key Laboratory of Chemical Resource Engineering, Beijing University of Chemical Technology, Beijing 100029, People's Republic of China

## Supplementary Tables

**Table S1** Gupta potential parameters for Au clusters<sup>1</sup>

| Parameter | $A/eV$ | $\zeta/eV$ | $p$    | $q$    | $r_0/\text{\AA}$ |
|-----------|--------|------------|--------|--------|------------------|
| Au-Au     | 0.2061 | 1.7900     | 10.229 | 4.0360 | 2.884            |

**Table S2** Energies and structures information of Au<sub>N</sub>(2-20) at pure DFT level. **Size**: also denoted as N, ranging from 2 to 20.  $E_{coh}$ : cohesive energy of cluster.  $\Delta E$ : the cohesive energy difference between the GM identified in this work and those reported previously<sup>2</sup>.  $D_2E$ : second finite energy difference of cluster, defined as  $D_2E = E_{N+1} + E_{N-1} - 2E_N$ .  $E_{fit}$ : by fitting  $E_{coh}$  to N arrived at  $0.716 - 1.822N^{-1} - 1.237N^{-2/3} + 2.656N^{-1/3}$ .  $\Delta E_{coh}$ : relative cohesive energies of clusters calculated by  $E_{fit} - E_{coh}$ . **Dia**: effective diameter of cluster, which is defined as the largest distance among atoms. **BL**: average bond length of cluster, with cutoff length be 3.3 Å.

| Size | $E_{coh}$ (eV) | $\Delta E$ (eV) | $D_2E$ (eV) | $\Delta E_{coh}$ (eV) | $E_{fit}$ (eV) | Dia (nm) | BL (Å) |
|------|----------------|-----------------|-------------|-----------------------|----------------|----------|--------|
| 2    | 0.948          | -0.003          | -           | -0.064                | 0.884          | 0.2512   | 2.6992 |
| 3    | 0.965          | 0.023           | -1.375      | 0.196                 | 1.16           | 0.466    | 2.8311 |
| 4    | 1.317          | -0.02           | 0.413       | 0.015                 | 1.332          | 0.4683   | 2.8306 |
| 5    | 1.445          | -0.033          | -0.997      | 0.007                 | 1.452          | 0.4614   | 2.8295 |
| 6    | 1.697          | -0.016          | 1.624       | -0.155                | 1.542          | 0.5275   | 2.8375 |
| 7    | 1.646          | -0.016          | -1.329      | -0.032                | 1.613          | 0.7054   | 2.8215 |
| 8    | 1.773          | -0.013          | 1.249       | -0.102                | 1.671          | 0.7037   | 2.8316 |
| 9    | 1.733          | -0.024          | -1.137      | -0.014                | 1.719          | 0.8093   | 2.8309 |
| 10   | 1.815          | 0.003           | 0.629       | -0.054                | 1.76           | 0.9537   | 2.8313 |
| 11   | 1.825          | -0.01           | -0.368      | -0.029                | 1.796          | 0.9311   | 2.8267 |
| 12   | 1.863          | -0.002          | 0.44        | -0.036                | 1.827          | 0.7984   | 2.8227 |
| 13   | 1.862          | -0.007          | -0.844      | -0.007                | 1.855          | 1.2284   | 2.7129 |
| 14   | 1.922          | -0.011          | 0.941       | -0.042                | 1.88           | 0.787    | 2.835  |
| 15   | 1.91           | -0.011          | -0.53       | -0.008                | 1.902          | 0.7254   | 2.8307 |
| 16   | 1.934          | -0.03           | -0.19       | -0.011                | 1.922          | 0.7595   | 2.8346 |
| 17   | 1.965          | -0.008          | -0.17       | -0.024                | 1.941          | 0.9391   | 2.8347 |
| 18   | 2.003          | -0.026          | 1.351       | -0.045                | 1.958          | 0.7161   | 2.833  |
| 19   | 1.965          | 0.045           | -1.337      | 0.008                 | 1.974          | 0.8368   | 2.8301 |
| 20   | 1.999          | -0.098          | 1.828       | -0.01                 | 1.988          | 0.9153   | 2.8238 |

**Table S3** Energies and structures information of Au<sub>N</sub> (20-300) at Gupta combined DFT level. **Size**: also denoted as N, ranging from 21 to 300. **E<sub>coh</sub>**: cohesive energy of cluster. **D<sub>2</sub>E**: second finite energy difference of cluster, defined as D<sub>2</sub>E=E<sub>N+1</sub>+E<sub>N-1</sub>-2E<sub>N</sub>. **E<sub>fit</sub>**: by fitting **E<sub>coh</sub>** to N arrived at 0.716-1.822N<sup>-1</sup>-1.237N<sup>-2/3</sup>+2.656N<sup>-1/3</sup>. **ΔE<sub>coh</sub>**: relative cohesive energies of clusters calculated by **E<sub>fit</sub>** - **E<sub>coh</sub>**. **Dia**: diameters of cluster, which is defined as the largest distance among atoms. **BL**: average bond length of cluster, with cutoff length be 3.3 Å.

| <b>Size</b> | <b>E<sub>coh</sub> (eV)</b> | <b>D<sub>2</sub>E (eV)</b> | <b>ΔE<sub>coh</sub>(eV)</b> | <b>E<sub>fit</sub> (eV)</b> | <b>Dia(nm)</b> | <b>BL(Å)</b> |
|-------------|-----------------------------|----------------------------|-----------------------------|-----------------------------|----------------|--------------|
| 21          | 1.941                       | -0.803                     | 0.06                        | 2.002                       | 0.7087         | 2.824        |
| 22          | 1.926                       | -0.952                     | 0.088                       | 2.014                       | 0.7421         | 2.8311       |
| 23          | 1.953                       | -0.142                     | 0.073                       | 2.026                       | 0.8095         | 2.8361       |
| 24          | 1.984                       | 0.377                      | 0.053                       | 2.037                       | 0.8373         | 2.7797       |
| 25          | 1.998                       | 0.307                      | 0.05                        | 2.048                       | 0.8482         | 2.8313       |
| 26          | 1.998                       | 0.514                      | 0.059                       | 2.058                       | 0.8033         | 2.8359       |
| 27          | 1.98                        | -1.44                      | 0.087                       | 2.067                       | 0.8152         | 2.8238       |
| 28          | 2.014                       | 0.576                      | 0.062                       | 2.076                       | 0.8613         | 2.8326       |
| 29          | 2.026                       | -0.863                     | 0.058                       | 2.084                       | 0.8457         | 2.8351       |
| 30          | 2.066                       | 1.204                      | 0.026                       | 2.092                       | 0.8334         | 2.8256       |
| 31          | 2.065                       | -0.57                      | 0.036                       | 2.1                         | 0.8168         | 2.8327       |
| 32          | 2.081                       | 0.509                      | 0.026                       | 2.107                       | 0.8282         | 2.8348       |
| 33          | 2.081                       | -1.515                     | 0.033                       | 2.114                       | 0.8073         | 2.8361       |
| 34          | 2.126                       | -0.701                     | -0.005                      | 2.121                       | 0.8858         | 2.8321       |
| 35          | 2.188                       | 7.436                      | -0.06                       | 2.127                       | 0.9484         | 2.7246       |
| 36          | 2.04                        | -8.277                     | 0.094                       | 2.134                       | 1.0138         | 2.8358       |
| 37          | 2.124                       | 3.172                      | 0.016                       | 2.139                       | 0.9182         | 2.8251       |
| 38          | 2.12                        | 0.204                      | 0.026                       | 2.145                       | 0.8921         | 2.8259       |
| 39          | 2.11                        | -0.38                      | 0.04                        | 2.151                       | 0.92           | 2.8358       |
| 40          | 2.111                       | -1.265                     | 0.045                       | 2.156                       | 0.9051         | 2.8371       |
| 41          | 2.143                       | 1.56                       | 0.018                       | 2.161                       | 0.9505         | 2.8366       |
| 42          | 2.136                       | -0.545                     | 0.03                        | 2.166                       | 1.003          | 2.83         |
| 43          | 2.142                       | -0.062                     | 0.029                       | 2.171                       | 0.8655         | 2.8249       |
| 44          | 2.149                       | 0.14                       | 0.026                       | 2.175                       | 1.0412         | 2.8371       |
| 45          | 2.153                       | -0.627                     | 0.027                       | 2.18                        | 1.0111         | 2.8296       |
| 46          | 2.17                        | 0.798                      | 0.014                       | 2.184                       | 1.1063         | 2.7715       |
| 47          | 2.169                       | -0.479                     | 0.019                       | 2.188                       | 0.9647         | 2.8343       |
| 48          | 2.179                       | 0.989                      | 0.013                       | 2.192                       | 0.9703         | 2.8369       |
| 49          | 2.168                       | -1.993                     | 0.028                       | 2.196                       | 1.075          | 2.8395       |
| 50          | 2.197                       | 1.283                      | 0.003                       | 2.2                         | 1.082          | 2.8343       |
| 51          | 2.2                         | 0.576                      | 0.004                       | 2.203                       | 0.9649         | 2.8427       |
| 52          | 2.191                       | -4.714                     | 0.016                       | 2.207                       | 1.0738         | 2.8379       |
| 53          | 2.272                       | 10.273                     | -0.062                      | 2.21                        | 1.0499         | 2.8431       |
| 54          | 2.16                        | -11.798                    | 0.054                       | 2.214                       | 1.0836         | 2.8283       |
| 55          | 2.266                       | 11.35                      | -0.049                      | 2.217                       | 1.2459         | 2.8261       |
| 56          | 2.166                       | -9.219                     | 0.054                       | 2.22                        | 1.0171         | 2.8277       |
| 57          | 2.231                       | 3.382                      | -0.008                      | 2.224                       | 1.1913         | 2.8039       |
| 58          | 2.236                       | -0.17                      | -0.009                      | 2.227                       | 1.0836         | 2.8427       |
| 59          | 2.243                       | 0.598                      | -0.014                      | 2.23                        | 1.0888         | 2.839        |

---

|     |       |         |        |       |        |        |
|-----|-------|---------|--------|-------|--------|--------|
| 60  | 2.24  | -1.357  | -0.008 | 2.233 | 1.162  | 2.8458 |
| 61  | 2.26  | 1.598   | -0.024 | 2.235 | 1.0851 | 2.8366 |
| 62  | 2.253 | -0.485  | -0.014 | 2.238 | 1.1009 | 2.8297 |
| 63  | 2.254 | -0.128  | -0.013 | 2.241 | 1.1896 | 2.841  |
| 64  | 2.256 | 0.106   | -0.013 | 2.243 | 1.0868 | 2.841  |
| 65  | 2.258 | -0.129  | -0.011 | 2.246 | 1.1473 | 2.8395 |
| 66  | 2.261 | 0.759   | -0.012 | 2.249 | 1.1472 | 2.8293 |
| 67  | 2.252 | -1.377  | -0.001 | 2.251 | 1.1539 | 2.8389 |
| 68  | 2.264 | 0.39    | -0.011 | 2.254 | 1.1785 | 2.8082 |
| 69  | 2.271 | 0.163   | -0.015 | 2.256 | 1.1021 | 2.8393 |
| 70  | 2.274 | -0.231  | -0.016 | 2.258 | 1.1614 | 2.8301 |
| 71  | 2.281 | 1.416   | -0.021 | 2.261 | 1.3618 | 2.8401 |
| 72  | 2.268 | -7.201  | -0.005 | 2.263 | 1.1239 | 2.8415 |
| 73  | 2.354 | 11.575  | -0.089 | 2.265 | 1.1754 | 2.8415 |
| 74  | 2.281 | 0.153   | -0.014 | 2.267 | 1.2787 | 2.8452 |
| 75  | 2.208 | -11.159 | 0.061  | 2.269 | 1.304  | 2.8406 |
| 76  | 2.284 | 2.092   | -0.013 | 2.271 | 1.2628 | 2.8444 |
| 77  | 2.331 | 9.91    | -0.058 | 2.273 | 1.3334 | 2.838  |
| 78  | 2.249 | -9.129  | 0.026  | 2.275 | 1.2144 | 2.841  |
| 79  | 2.285 | 2.019   | -0.008 | 2.277 | 1.2472 | 2.7994 |
| 80  | 2.295 | 0.643   | -0.016 | 2.279 | 1.3324 | 2.8321 |
| 81  | 2.297 | 0.199   | -0.016 | 2.281 | 1.2927 | 2.8386 |
| 82  | 2.296 | -0.359  | -0.014 | 2.283 | 1.2036 | 2.8325 |
| 83  | 2.3   | -0.079  | -0.015 | 2.285 | 1.3617 | 2.8315 |
| 84  | 2.305 | 0.658   | -0.018 | 2.287 | 1.345  | 2.8395 |
| 85  | 2.301 | -0.449  | -0.013 | 2.288 | 1.2435 | 2.8431 |
| 86  | 2.303 | 0.325   | -0.013 | 2.29  | 1.3661 | 2.8415 |
| 87  | 2.301 | -0.658  | -0.01  | 2.292 | 1.2285 | 2.8408 |
| 88  | 2.307 | 0.471   | -0.014 | 2.293 | 1.3226 | 2.8332 |
| 89  | 2.307 | 0.074   | -0.012 | 2.295 | 1.3576 | 2.8421 |
| 90  | 2.307 | -0.143  | -0.01  | 2.297 | 1.3397 | 2.8088 |
| 91  | 2.308 | -0.183  | -0.01  | 2.298 | 1.3536 | 2.8312 |
| 92  | 2.311 | 0.036   | -0.011 | 2.3   | 1.3405 | 2.8319 |
| 93  | 2.313 | -0.11   | -0.012 | 2.301 | 1.3942 | 2.8409 |
| 94  | 2.317 | 0.941   | -0.014 | 2.303 | 1.2568 | 2.8334 |
| 95  | 2.311 | -1.615  | -0.006 | 2.304 | 1.3468 | 2.8385 |
| 96  | 2.321 | 1.595   | -0.015 | 2.306 | 1.3981 | 2.8325 |
| 97  | 2.315 | -0.698  | -0.008 | 2.307 | 1.3239 | 2.8427 |
| 98  | 2.316 | -1.722  | -0.008 | 2.309 | 1.4898 | 2.8344 |
| 99  | 2.335 | 1.773   | -0.025 | 2.31  | 1.3848 | 2.8354 |
| 100 | 2.335 | 1.428   | -0.024 | 2.312 | 1.4022 | 2.8432 |
| 101 | 2.322 | -1.869  | -0.009 | 2.313 | 1.3816 | 2.8369 |
| 102 | 2.327 | 0.453   | -0.012 | 2.314 | 1.2541 | 2.8444 |
| 103 | 2.327 | -0.143  | -0.012 | 2.316 | 1.358  | 2.8322 |
| 104 | 2.329 | 0.117   | -0.012 | 2.317 | 1.5096 | 2.8353 |
| 105 | 2.33  | -0.096  | -0.011 | 2.318 | 1.3825 | 2.8416 |
| 106 | 2.331 | 0.156   | -0.012 | 2.319 | 1.4162 | 2.8409 |
| 107 | 2.331 | -0.031  | -0.01  | 2.321 | 1.3739 | 2.8342 |
| 108 | 2.331 | -0.817  | -0.009 | 2.322 | 1.4483 | 2.8424 |

---

---

|     |       |        |        |       |        |        |
|-----|-------|--------|--------|-------|--------|--------|
| 109 | 2.339 | 1.767  | -0.016 | 2.323 | 1.4108 | 2.8346 |
| 110 | 2.331 | -1.045 | -0.006 | 2.324 | 1.4611 | 2.8318 |
| 111 | 2.332 | -0.251 | -0.006 | 2.326 | 1.3825 | 2.8435 |
| 112 | 2.335 | 0.836  | -0.009 | 2.327 | 1.5499 | 2.5122 |
| 113 | 2.331 | -1.626 | -0.003 | 2.328 | 1.5259 | 2.7989 |
| 114 | 2.342 | 1.65   | -0.013 | 2.329 | 1.5594 | 2.8456 |
| 115 | 2.337 | -1.395 | -0.007 | 2.33  | 1.4311 | 2.8406 |
| 116 | 2.345 | 1.066  | -0.014 | 2.331 | 1.3912 | 2.8333 |
| 117 | 2.344 | 0.101  | -0.011 | 2.332 | 1.5421 | 2.8387 |
| 118 | 2.342 | -2.613 | -0.008 | 2.334 | 1.3793 | 2.8439 |
| 119 | 2.361 | 2.175  | -0.027 | 2.335 | 1.4121 | 2.8382 |
| 120 | 2.363 | 2.056  | -0.027 | 2.336 | 1.6196 | 2.8334 |
| 121 | 2.347 | -1.993 | -0.01  | 2.337 | 1.5302 | 2.8392 |
| 122 | 2.348 | -0.082 | -0.01  | 2.338 | 1.5884 | 2.832  |
| 123 | 2.349 | -0.211 | -0.011 | 2.339 | 1.5198 | 2.8438 |
| 124 | 2.353 | 0.241  | -0.013 | 2.34  | 1.5188 | 2.7993 |
| 125 | 2.354 | 0.33   | -0.013 | 2.341 | 1.4829 | 2.8409 |
| 126 | 2.353 | 0.339  | -0.011 | 2.342 | 1.5295 | 2.8457 |
| 127 | 2.348 | -1.271 | -0.006 | 2.343 | 1.5478 | 2.8363 |
| 128 | 2.354 | 0.555  | -0.011 | 2.344 | 1.5188 | 2.8442 |
| 129 | 2.356 | 1.027  | -0.011 | 2.345 | 1.5359 | 2.8424 |
| 130 | 2.35  | -1.413 | -0.004 | 2.346 | 1.5034 | 2.8414 |
| 131 | 2.354 | 0.448  | -0.007 | 2.347 | 1.6068 | 2.8352 |
| 132 | 2.355 | 0.055  | -0.007 | 2.348 | 1.5909 | 2.8412 |
| 133 | 2.356 | -0.155 | -0.007 | 2.349 | 1.6247 | 2.8416 |
| 134 | 2.357 | 0.276  | -0.008 | 2.349 | 1.4715 | 2.846  |
| 135 | 2.357 | -0.421 | -0.007 | 2.35  | 1.5461 | 2.7729 |
| 136 | 2.36  | 0.98   | -0.009 | 2.351 | 1.6907 | 2.8372 |
| 137 | 2.356 | -1.764 | -0.003 | 2.352 | 1.6897 | 2.8464 |
| 138 | 2.364 | 0.546  | -0.011 | 2.353 | 1.4977 | 2.8468 |
| 139 | 2.368 | -2.988 | -0.015 | 2.354 | 1.6072 | 2.8376 |
| 140 | 2.394 | 7.957  | -0.039 | 2.355 | 1.5633 | 2.8374 |
| 141 | 2.363 | -4.071 | -0.007 | 2.356 | 1.542  | 2.8367 |
| 142 | 2.361 | -1.289 | -0.005 | 2.356 | 1.5473 | 2.8358 |
| 143 | 2.368 | 0.711  | -0.011 | 2.357 | 1.5359 | 2.8362 |
| 144 | 2.37  | 0.104  | -0.012 | 2.358 | 1.514  | 2.8374 |
| 145 | 2.371 | -0.052 | -0.012 | 2.359 | 1.6257 | 2.847  |
| 146 | 2.373 | 0.537  | -0.013 | 2.36  | 1.6328 | 2.7813 |
| 147 | 2.371 | 0.06   | -0.01  | 2.361 | 1.7809 | 2.8428 |
| 148 | 2.368 | -0.245 | -0.007 | 2.361 | 1.602  | 2.8359 |
| 149 | 2.368 | -1.078 | -0.005 | 2.362 | 1.764  | 2.8475 |
| 150 | 2.374 | 1.436  | -0.011 | 2.363 | 1.6344 | 2.8378 |
| 151 | 2.371 | -0.617 | -0.007 | 2.364 | 1.6947 | 2.8439 |
| 152 | 2.372 | 0.293  | -0.007 | 2.364 | 1.6407 | 2.842  |
| 153 | 2.371 | -0.016 | -0.006 | 2.365 | 1.7178 | 2.8475 |
| 154 | 2.37  | 0.109  | -0.004 | 2.366 | 1.6924 | 2.8373 |
| 155 | 2.368 | 0.612  | -0.002 | 2.367 | 1.6844 | 2.8388 |
| 156 | 2.363 | -2.423 | 0.005  | 2.367 | 1.6168 | 2.8385 |
| 157 | 2.373 | 1.053  | -0.005 | 2.368 | 1.7493 | 2.7739 |

---

---

|     |       |        |        |       |        |        |
|-----|-------|--------|--------|-------|--------|--------|
| 158 | 2.376 | 0.475  | -0.007 | 2.369 | 1.6085 | 2.8463 |
| 159 | 2.376 | -0.367 | -0.007 | 2.37  | 1.6792 | 2.8446 |
| 160 | 2.379 | 0.664  | -0.008 | 2.37  | 1.6691 | 2.8382 |
| 161 | 2.377 | 0.621  | -0.006 | 2.371 | 1.7535 | 2.8385 |
| 162 | 2.372 | -2.341 | 0      | 2.372 | 1.7046 | 2.8395 |
| 163 | 2.38  | 2.015  | -0.008 | 2.372 | 1.6676 | 2.838  |
| 164 | 2.377 | 0.117  | -0.004 | 2.373 | 1.6607 | 2.8379 |
| 165 | 2.373 | -1.814 | 0.001  | 2.374 | 1.6562 | 2.838  |
| 166 | 2.38  | 1.441  | -0.005 | 2.374 | 1.6835 | 2.8455 |
| 167 | 2.378 | 0.111  | -0.003 | 2.375 | 1.7216 | 2.8404 |
| 168 | 2.375 | -0.829 | 0      | 2.376 | 1.7064 | 2.7816 |
| 169 | 2.378 | -0.798 | -0.002 | 2.376 | 1.6944 | 2.8388 |
| 170 | 2.385 | 1.671  | -0.008 | 2.377 | 1.7616 | 2.8386 |
| 171 | 2.382 | -0.982 | -0.005 | 2.378 | 1.6965 | 2.8382 |
| 172 | 2.385 | 1.975  | -0.007 | 2.378 | 1.5772 | 2.8383 |
| 173 | 2.377 | -2.402 | 0.002  | 2.379 | 1.7707 | 2.8447 |
| 174 | 2.382 | 1.069  | -0.003 | 2.38  | 1.6951 | 2.8449 |
| 175 | 2.382 | 0.192  | -0.001 | 2.38  | 1.7129 | 2.849  |
| 176 | 2.38  | -1.488 | 0.001  | 2.381 | 1.7216 | 2.8457 |
| 177 | 2.386 | 1.738  | -0.005 | 2.381 | 1.6775 | 2.8369 |
| 178 | 2.383 | -0.513 | -0.001 | 2.382 | 1.8569 | 2.8474 |
| 179 | 2.383 | -0.6   | 0      | 2.383 | 1.7292 | 2.7922 |
| 180 | 2.386 | 0.569  | -0.003 | 2.383 | 1.7413 | 2.8454 |
| 181 | 2.386 | 0.485  | -0.002 | 2.384 | 1.9682 | 2.8376 |
| 182 | 2.383 | -2.106 | 0.001  | 2.384 | 1.7549 | 2.8391 |
| 183 | 2.392 | 2.68   | -0.007 | 2.385 | 1.9685 | 2.8475 |
| 184 | 2.386 | -1.198 | 0      | 2.386 | 1.6703 | 2.8413 |
| 185 | 2.386 | 0.691  | 0      | 2.386 | 1.9492 | 2.8486 |
| 186 | 2.383 | -1.952 | 0.003  | 2.387 | 1.7771 | 2.8466 |
| 187 | 2.391 | 0.294  | -0.003 | 2.387 | 1.8672 | 2.851  |
| 188 | 2.396 | 2.308  | -0.008 | 2.388 | 1.8042 | 2.8488 |
| 189 | 2.39  | -0.445 | -0.001 | 2.388 | 1.7912 | 2.8378 |
| 190 | 2.386 | -1.897 | 0.003  | 2.389 | 1.6996 | 2.8046 |
| 191 | 2.391 | -0.352 | -0.002 | 2.389 | 1.7876 | 2.846  |
| 192 | 2.399 | 3.787  | -0.009 | 2.39  | 1.5802 | 2.8467 |
| 193 | 2.387 | -2.582 | 0.004  | 2.391 | 1.831  | 2.8499 |
| 194 | 2.388 | -0.245 | 0.003  | 2.391 | 1.7367 | 2.8474 |
| 195 | 2.391 | 0.405  | 0.001  | 2.392 | 1.9036 | 2.8396 |
| 196 | 2.391 | -1.034 | 0.001  | 2.392 | 1.988  | 2.8478 |
| 197 | 2.397 | 2.786  | -0.004 | 2.393 | 1.7508 | 2.8388 |
| 198 | 2.389 | -2.419 | 0.005  | 2.393 | 1.816  | 2.8389 |
| 199 | 2.392 | 1.101  | 0.001  | 2.394 | 1.8945 | 2.8451 |
| 200 | 2.391 | -0.781 | 0.003  | 2.394 | 1.9028 | 2.8489 |
| 201 | 2.393 | -0.149 | 0.002  | 2.395 | 1.8422 | 2.7788 |
| 202 | 2.396 | 0.887  | -0.001 | 2.395 | 1.8965 | 2.8396 |
| 203 | 2.394 | -0.498 | 0.001  | 2.396 | 1.8992 | 2.8409 |
| 204 | 2.395 | 0.395  | 0.001  | 2.396 | 1.846  | 2.8483 |
| 205 | 2.394 | -0.48  | 0.002  | 2.397 | 1.7618 | 2.8413 |
| 206 | 2.396 | 0.427  | 0.001  | 2.397 | 1.7525 | 2.841  |

---

---

|     |       |        |        |       |        |        |
|-----|-------|--------|--------|-------|--------|--------|
| 207 | 2.395 | 1.063  | 0.003  | 2.398 | 1.8202 | 2.8461 |
| 208 | 2.389 | -3.053 | 0.009  | 2.398 | 1.8824 | 2.8394 |
| 209 | 2.398 | 1.545  | 0.001  | 2.399 | 1.8401 | 2.8399 |
| 210 | 2.4   | 1.849  | 0      | 2.399 | 1.9287 | 2.8397 |
| 211 | 2.392 | -2.935 | 0.007  | 2.4   | 1.806  | 2.8399 |
| 212 | 2.399 | 1.172  | 0.001  | 2.4   | 1.9796 | 2.7873 |
| 213 | 2.4   | 0.282  | 0.001  | 2.401 | 1.7295 | 2.8503 |
| 214 | 2.399 | 0.615  | 0.002  | 2.401 | 1.809  | 2.8408 |
| 215 | 2.396 | -2.498 | 0.005  | 2.402 | 1.88   | 2.8472 |
| 216 | 2.405 | 3.818  | -0.003 | 2.402 | 1.7461 | 2.842  |
| 217 | 2.395 | -2.307 | 0.007  | 2.402 | 1.9776 | 2.8443 |
| 218 | 2.397 | 0.53   | 0.006  | 2.403 | 1.8144 | 2.8472 |
| 219 | 2.396 | -2.152 | 0.008  | 2.403 | 1.9606 | 2.841  |
| 220 | 2.405 | 2.685  | -0.001 | 2.404 | 1.8838 | 2.8521 |
| 221 | 2.401 | 0.523  | 0.003  | 2.404 | 1.8087 | 2.8401 |
| 222 | 2.395 | -3.03  | 0.009  | 2.405 | 1.8812 | 2.8414 |
| 223 | 2.403 | 2.29   | 0.002  | 2.405 | 1.95   | 2.5597 |
| 224 | 2.401 | -1.36  | 0.005  | 2.406 | 1.8765 | 2.7972 |
| 225 | 2.404 | 1.101  | 0.002  | 2.406 | 2.0084 | 2.8398 |
| 226 | 2.403 | -1.699 | 0.003  | 2.406 | 1.8031 | 2.8108 |
| 227 | 2.409 | 1.825  | -0.002 | 2.407 | 1.8728 | 2.807  |
| 228 | 2.407 | 1.348  | 0      | 2.407 | 1.8601 | 2.7975 |
| 229 | 2.4   | -1.7   | 0.008  | 2.408 | 1.9438 | 2.7949 |
| 230 | 2.399 | -2.129 | 0.009  | 2.408 | 1.9966 | 2.8058 |
| 231 | 2.408 | 2.605  | 0      | 2.409 | 2.0374 | 2.8027 |
| 232 | 2.406 | -1.76  | 0.003  | 2.409 | 1.9728 | 2.8011 |
| 233 | 2.411 | 4.056  | -0.002 | 2.409 | 1.9368 | 2.8189 |
| 234 | 2.399 | -4.004 | 0.011  | 2.41  | 1.9117 | 2.8095 |
| 235 | 2.404 | 2.388  | 0.006  | 2.41  | 1.8931 | 2.6769 |
| 236 | 2.399 | -3.438 | 0.012  | 2.411 | 1.9563 | 2.8226 |
| 237 | 2.408 | 1.291  | 0.003  | 2.411 | 2.089  | 2.7901 |
| 238 | 2.412 | 0.773  | -0.001 | 2.411 | 1.9115 | 2.8044 |
| 239 | 2.413 | 1.678  | -0.001 | 2.412 | 2.018  | 2.8097 |
| 240 | 2.406 | -1.178 | 0.006  | 2.412 | 1.8901 | 2.8215 |
| 241 | 2.405 | -0.767 | 0.008  | 2.413 | 2.0521 | 2.8164 |
| 242 | 2.407 | -1.372 | 0.006  | 2.413 | 2.2354 | 2.8054 |
| 243 | 2.414 | 2.955  | -0.001 | 2.413 | 1.9821 | 2.8064 |
| 244 | 2.409 | -1.185 | 0.004  | 2.414 | 1.8799 | 2.8016 |
| 245 | 2.409 | -1.643 | 0.005  | 2.414 | 1.8995 | 2.8114 |
| 246 | 2.416 | 2.747  | -0.002 | 2.415 | 1.9773 | 2.6928 |
| 247 | 2.412 | -0.04  | 0.003  | 2.415 | 1.9583 | 2.8136 |
| 248 | 2.408 | -1.011 | 0.008  | 2.415 | 1.9565 | 2.8119 |
| 249 | 2.407 | -1.323 | 0.008  | 2.416 | 1.8716 | 2.8199 |
| 250 | 2.413 | 0.507  | 0.003  | 2.416 | 1.9414 | 2.8089 |
| 251 | 2.416 | 2.35   | 0.001  | 2.416 | 1.8711 | 2.8081 |
| 252 | 2.409 | -2.298 | 0.007  | 2.417 | 1.9785 | 2.8036 |
| 253 | 2.412 | 1.733  | 0.005  | 2.417 | 2.1984 | 2.8152 |
| 254 | 2.408 | -1.443 | 0.009  | 2.418 | 1.8236 | 2.8187 |
| 255 | 2.41  | 0.946  | 0.008  | 2.418 | 1.9655 | 2.8165 |

---

---

|     |       |        |       |       |        |        |
|-----|-------|--------|-------|-------|--------|--------|
| 256 | 2.408 | -2.173 | 0.01  | 2.418 | 2.0632 | 2.8137 |
| 257 | 2.415 | 2.341  | 0.004 | 2.419 | 2.0615 | 2.6895 |
| 258 | 2.412 | -0.582 | 0.007 | 2.419 | 2.0551 | 2.8087 |
| 259 | 2.412 | 0.839  | 0.008 | 2.419 | 1.9697 | 2.8189 |
| 260 | 2.408 | -2.273 | 0.012 | 2.42  | 2.0322 | 2.8173 |
| 261 | 2.413 | 0.261  | 0.007 | 2.42  | 1.9531 | 2.821  |
| 262 | 2.417 | 3.694  | 0.003 | 2.42  | 2.0222 | 2.8195 |
| 263 | 2.407 | -4.895 | 0.013 | 2.421 | 1.9912 | 2.822  |
| 264 | 2.416 | 2.584  | 0.005 | 2.421 | 1.8861 | 2.8254 |
| 265 | 2.415 | -1.123 | 0.007 | 2.421 | 1.8384 | 2.8241 |
| 266 | 2.418 | 5.166  | 0.004 | 2.422 | 2.0924 | 2.8172 |
| 267 | 2.402 | -8.41  | 0.021 | 2.422 | 2.0279 | 2.8172 |
| 268 | 2.417 | 3.971  | 0.006 | 2.422 | 1.8984 | 2.6986 |
| 269 | 2.417 | 1.925  | 0.006 | 2.423 | 2.0506 | 2.8212 |
| 270 | 2.41  | -2.247 | 0.013 | 2.423 | 2.0385 | 2.8213 |
| 271 | 2.412 | -1.759 | 0.012 | 2.423 | 2.0864 | 2.8125 |
| 272 | 2.42  | 2.056  | 0.004 | 2.424 | 2.0563 | 2.8258 |
| 273 | 2.42  | -0.239 | 0.004 | 2.424 | 2.0789 | 2.8241 |
| 274 | 2.421 | 1.28   | 0.003 | 2.424 | 2.1547 | 2.8249 |
| 275 | 2.418 | -1.597 | 0.007 | 2.425 | 2.0757 | 2.8168 |
| 276 | 2.42  | 0.968  | 0.005 | 2.425 | 2.1079 | 2.8139 |
| 277 | 2.419 | 2.029  | 0.006 | 2.425 | 2.093  | 2.8205 |
| 278 | 2.411 | -4.289 | 0.015 | 2.426 | 2.2127 | 2.8234 |
| 279 | 2.418 | 1.1    | 0.008 | 2.426 | 2.056  | 2.6738 |
| 280 | 2.421 | 0.667  | 0.005 | 2.426 | 1.9647 | 2.8325 |
| 281 | 2.422 | 0.974  | 0.005 | 2.427 | 2.1498 | 2.8263 |
| 282 | 2.419 | -1.014 | 0.008 | 2.427 | 1.9426 | 2.8232 |
| 283 | 2.42  | -0.292 | 0.008 | 2.427 | 2.1954 | 2.8248 |
| 284 | 2.422 | 1.855  | 0.006 | 2.428 | 2.0281 | 2.823  |
| 285 | 2.417 | -2.817 | 0.011 | 2.428 | 2.1992 | 2.8168 |
| 286 | 2.422 | 1.623  | 0.006 | 2.428 | 2.0689 | 2.8251 |
| 287 | 2.422 | -0.896 | 0.007 | 2.429 | 2.2374 | 2.8146 |
| 288 | 2.424 | 2.951  | 0.005 | 2.429 | 1.9727 | 2.8258 |
| 289 | 2.417 | -3.996 | 0.013 | 2.429 | 2.1763 | 2.83   |
| 290 | 2.423 | 1.275  | 0.007 | 2.429 | 2.0878 | 2.7021 |
| 291 | 2.425 | 3.062  | 0.005 | 2.43  | 2.1015 | 2.8137 |
| 292 | 2.416 | -5.35  | 0.014 | 2.43  | 2.0519 | 2.8284 |
| 293 | 2.426 | 5.238  | 0.005 | 2.43  | 1.9965 | 2.8305 |
| 294 | 2.417 | -2.993 | 0.013 | 2.431 | 2.092  | 2.8297 |
| 295 | 2.419 | -0.598 | 0.012 | 2.431 | 2.1588 | 2.8309 |
| 296 | 2.423 | 0.72   | 0.008 | 2.431 | 2.1246 | 2.8304 |
| 297 | 2.425 | 0.85   | 0.007 | 2.432 | 2.0117 | 2.8214 |
| 298 | 2.423 | -1.594 | 0.009 | 2.432 | 2.0612 | 2.8324 |
| 299 | 2.427 | 1.819  | 0.005 | 2.432 | 2.0539 | 2.8307 |
| 300 | 2.425 | -      | 0.007 | 2.432 | 2.3497 | 2.8296 |

---



**Table S4** Experimental result values obtained by GA, PSO, RPSO for d=30 through 50 independent runs

| F  | GA              |                 |                 |                 |       | PSO             |                 |                 |                 |        | RPSO            |                 |                 |                 |                 |
|----|-----------------|-----------------|-----------------|-----------------|-------|-----------------|-----------------|-----------------|-----------------|--------|-----------------|-----------------|-----------------|-----------------|-----------------|
|    | Best            | Worst           | Mean            | S.D.            | T(s)  | Best            | Worst           | Mean            | S.D.            | T(s)   | Best            | Worst           | Mean            | S.D.            | T(s)            |
| 1  | <b>0.00E+00</b> | <b>0.00E+00</b> | <b>0.00E+00</b> | <b>0.00E+00</b> | 47.14 | 1.11E-06        | 3.67E-06        | 2.13E-06        | 7.04E-07        | 36.44  | <b>0.00E+00</b> | <b>0.00E+00</b> | <b>0.00E+00</b> | <b>0.00E+00</b> | 0.1586          |
| 2  | 1.30E-04        | 8.72E-04        | 4.23E-04        | 1.59E-04        | 53.18 | 1.20E-02        | 7.42E-02        | 3.42E-02        | 1.73E-02        | 42.33  | <b>0.00E+00</b> | <b>0.00E+00</b> | <b>0.00E+00</b> | <b>0.00E+00</b> | <b>2.071</b>    |
| 3  | 2.89E+00        | 9.04E+01        | 7.90E+01        | 1.85E+01        | 62.66 | 1.12E+01        | 2.17E+02        | 5.14E+01        | 5.15E+01        | 51.47  | <b>0.00E+00</b> | <b>3.99E+00</b> | <b>1.51E+00</b> | <b>1.95E+00</b> | <b>22.98</b>    |
| 4  | <b>0.00E+00</b> | 1.25E+03        | 2.64E+01        | 9.12E+02        | 68.54 | 0.00E+00        | 5.76E+04        | 3.45E+03        | 6.67E+02        | 54.78  | <b>0.00E+00</b> | <b>1.02E+02</b> | <b>5.21E+01</b> | <b>3.24E+01</b> | <b>12.77</b>    |
| 5  | <b>0.00E+00</b> | 1.00E-01        | 2.00E-02        | 1.41E-01        | 55.46 | 9.95E+00        | 2.49E+01        | 1.58E+01        | 3.54E+00        | 45.49  | <b>0.00E+00</b> | <b>0.00E+00</b> | <b>0.00E+00</b> | <b>0.00E+00</b> | <b>0.06321</b>  |
| 6  | 5.56E-05        | 2.62E-04        | 1.13E-04        | 4.36E-05        | 67.83 | 1.31E-03        | 2.01E+01        | 9.70E+00        | 9.88E+00        | 57.53  | <b>0.00E+00</b> | <b>0.00E+00</b> | <b>0.00E+00</b> | <b>0.00E+00</b> | <b>5.464</b>    |
| 7  | 7.40E-03        | 3.30E-01        | 1.03E-01        | 7.33E-02        | 67.62 | 3.95E-07        | 8.10E-02        | 1.50E-02        | 1.98E-02        | 56.28  | <b>0.00E+00</b> | <b>0.00E+00</b> | <b>0.00E+00</b> | <b>0.00E+00</b> | <b>4.253</b>    |
| 8  | <b>0.00E+00</b> | <b>0.00E+00</b> | <b>0.00E+00</b> | <b>0.00E+00</b> | 124.1 | 1.96E-07        | 1.51E+01        | 2.25E+00        | 2.60E+00        | 108.8  | <b>0.00E+00</b> | <b>0.00E+00</b> | <b>0.00E+00</b> | <b>0.00E+00</b> | <b>16.31</b>    |
| 9  | <b>0.00E+00</b> | <b>0.00E+00</b> | <b>0.00E+00</b> | <b>0.00E+00</b> | 123.1 | 1.87E-06        | 7.73E-06        | 3.81E-06        | 1.22E-06        | 109.0  | <b>0.00E+00</b> | <b>0.00E+00</b> | <b>0.00E+00</b> | <b>0.00E+00</b> | <b>3.391</b>    |
| 10 | <b>0.00E+00</b> | 8.62E-07        | 0.00E+00        | 1.50E-07        | 57.48 | <b>0.00E+00</b> | <b>0.00E+00</b> | <b>0.00E+00</b> | <b>0.00E+00</b> | 0.6021 | <b>0.00E+00</b> | <b>0.00E+00</b> | <b>0.00E+00</b> | <b>0.00E+00</b> | <b>0.1101</b>   |
| 11 | <b>0.00E+00</b> | <b>0.00E+00</b> | <b>0.00E+00</b> | <b>0.00E+00</b> | 61.08 | 1.18E-06        | 4.52E-06        | 2.06E-06        | 6.30E-07        | 49.63  | <b>0.00E+00</b> | <b>0.00E+00</b> | <b>0.00E+00</b> | <b>0.00E+00</b> | <b>0.1674</b>   |
| 12 | <b>0.00E+00</b> | <b>0.00E+00</b> | <b>0.00E+00</b> | <b>0.00E+00</b> | 75.91 | <b>0.00E+00</b> | <b>0.00E+00</b> | <b>0.00E+00</b> | <b>0.00E+00</b> | 0.1987 | <b>0.00E+00</b> | <b>0.00E+00</b> | <b>0.00E+00</b> | <b>0.00E+00</b> | <b>0.007233</b> |
| 13 | <b>0.00E+00</b> | <b>0.00E+00</b> | <b>0.00E+00</b> | <b>0.00E+00</b> | 51.72 | <b>0.00E+00</b> | <b>0.00E+00</b> | <b>0.00E+00</b> | <b>0.00E+00</b> | 42.51  | <b>0.00E+00</b> | <b>0.00E+00</b> | <b>0.00E+00</b> | <b>0.00E+00</b> | <b>0.5478</b>   |
| 14 | 9.90E-02        | 2.72E-01        | 1.83E-01        | <b>4.32E-02</b> | 69.77 | 6.82E-02        | 2.72E-01        | 1.39E-01        | 4.64E-02        | 59.35  | <b>1.90E-02</b> | 4.57E-01        | <b>4.68E-02</b> | 8.53E-02        | 47.48           |
| 15 | 2.67E-05        | 2.70E-03        | 7.64E-04        | 6.12E-04        | 69.63 | 1.78E-01        | 2.74E+00        | 7.96E-01        | 5.78E-01        | 58.90  | <b>0.00E+00</b> | <b>0.00E+00</b> | <b>0.00E+00</b> | <b>0.00E+00</b> | <b>0.6101</b>   |

S.D., standard deviation, T, mean CPU time. The best experimental result values are marked bold.

## Supplementary Figures

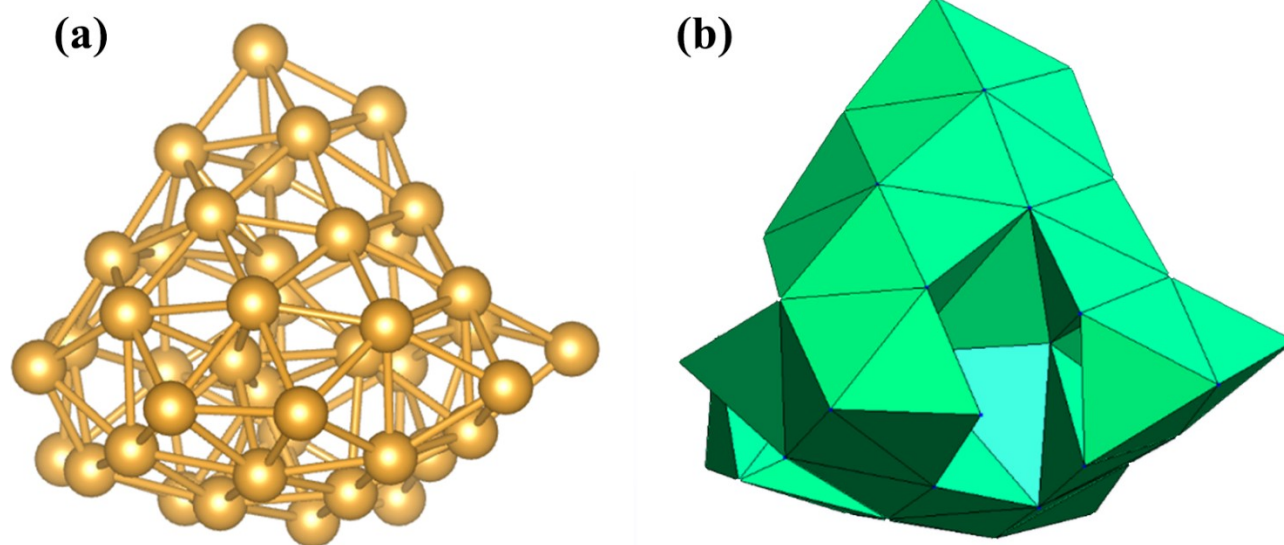

**Figure S1.** (a) Au<sub>42</sub> cluster in ball-and-stick view. (b) Alpha shape corresponding to Au<sub>42</sub> cluster.

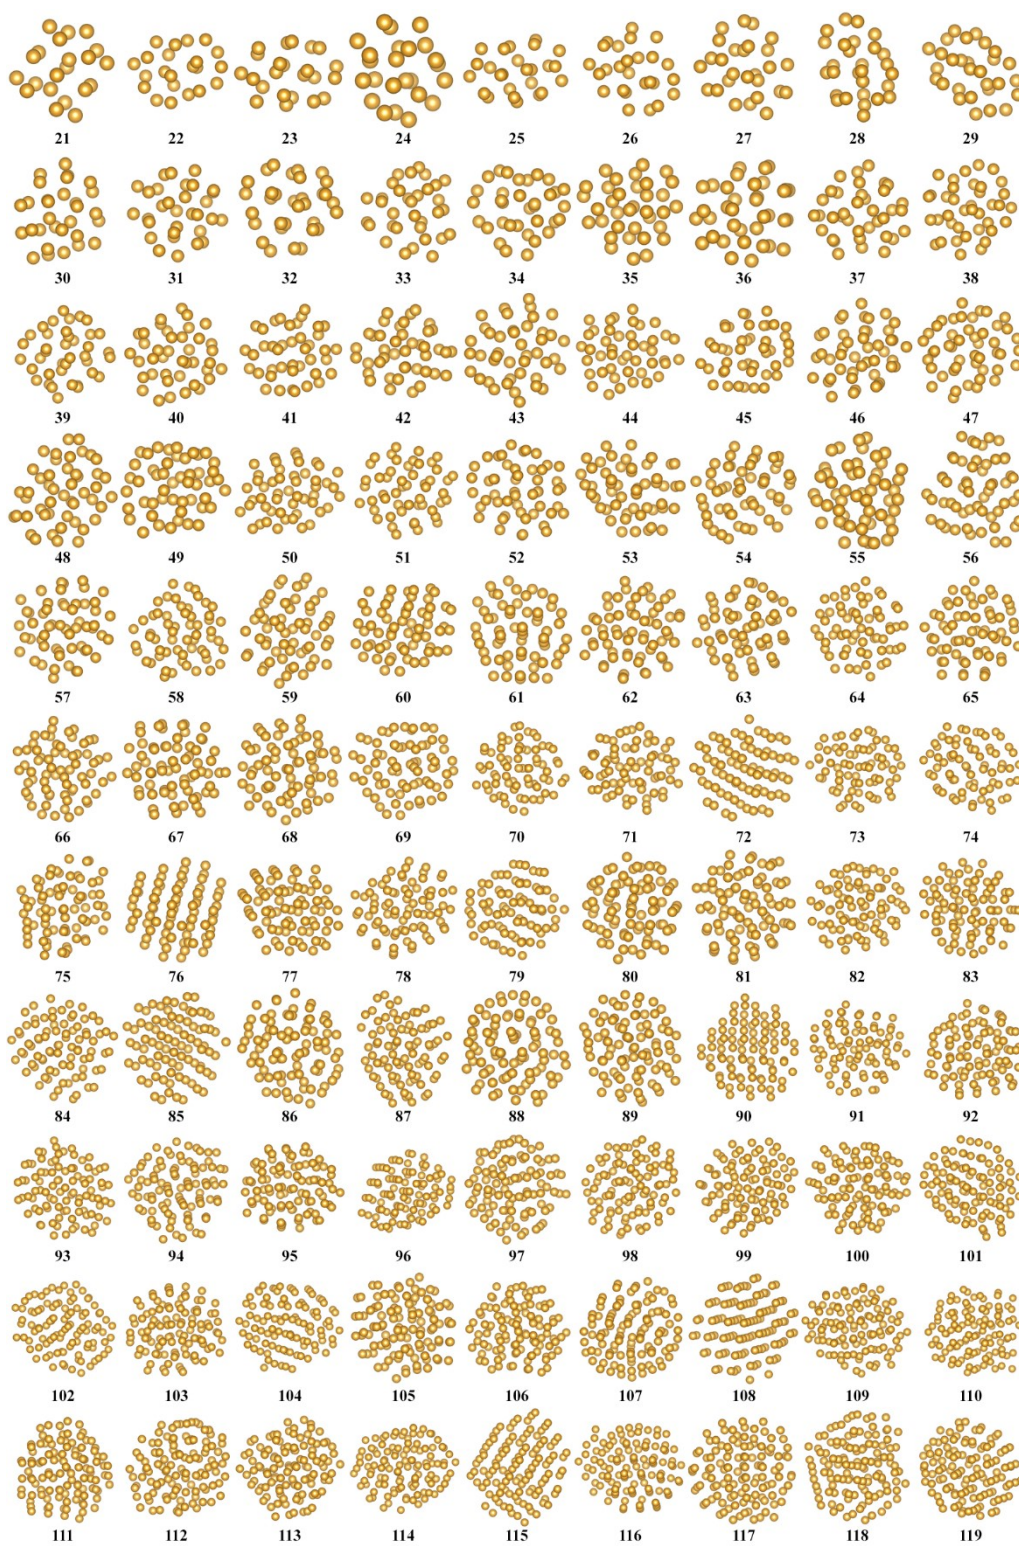

**Figure S2 (a).** Snapshots of structures of  $\text{Au}_N$  cluster ( $N=21-119$ ) obtained by RPSO.

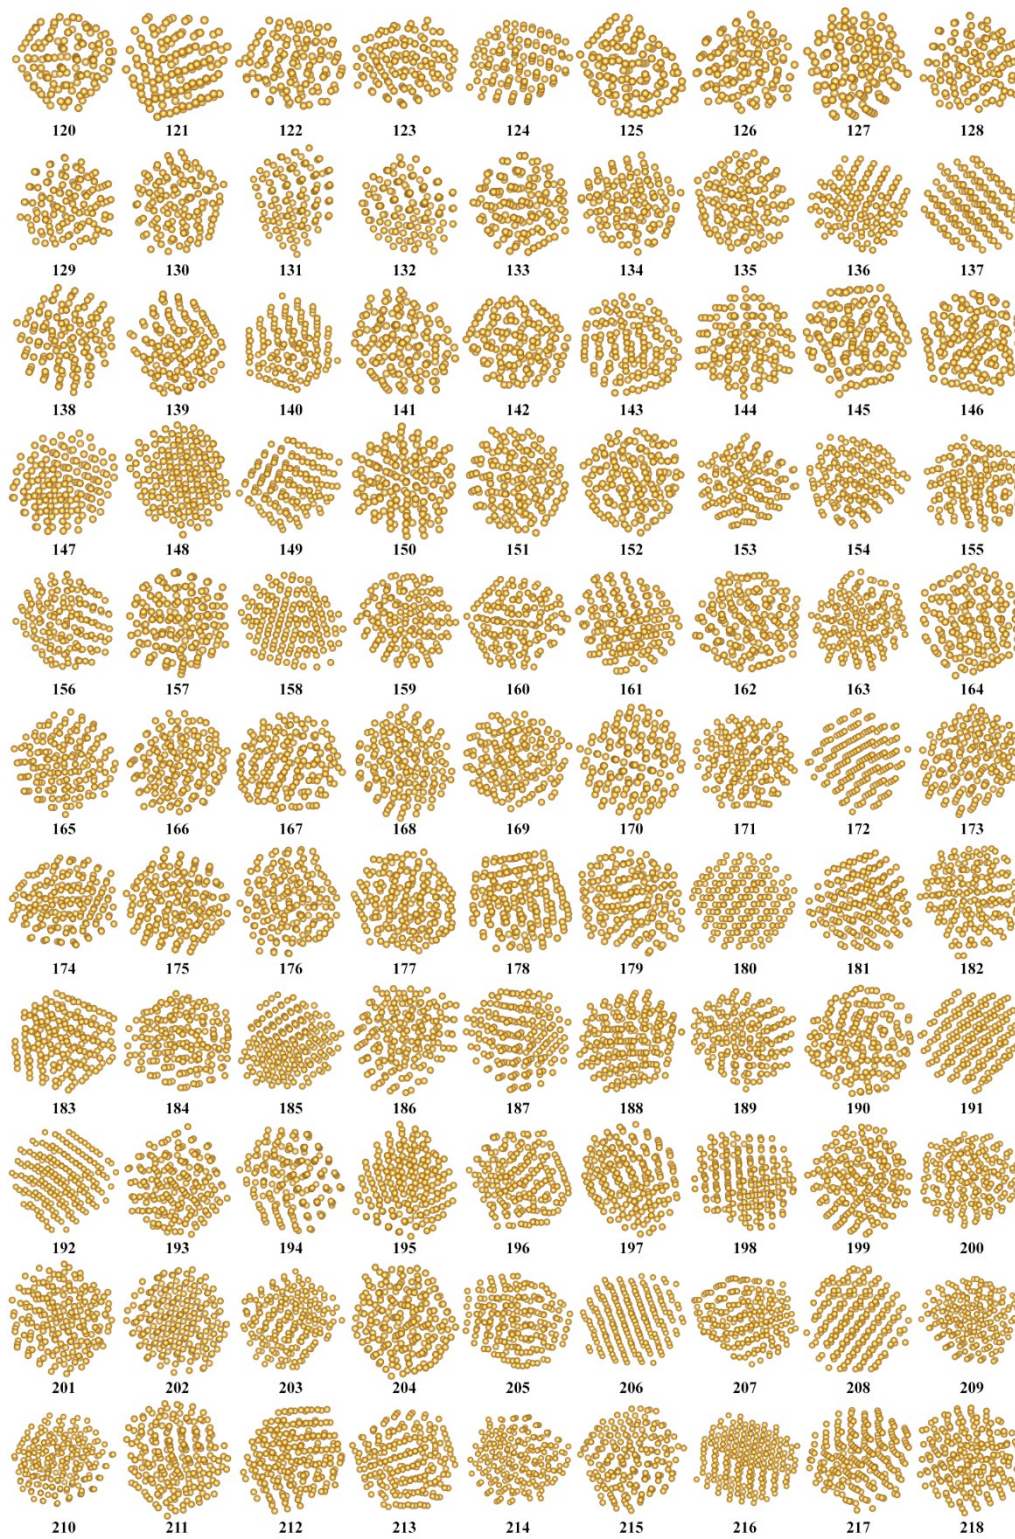

**Figure S2 (b).** Snapshots of structures of Au<sub>N</sub> cluster (N=120-218) obtained by RPSO.

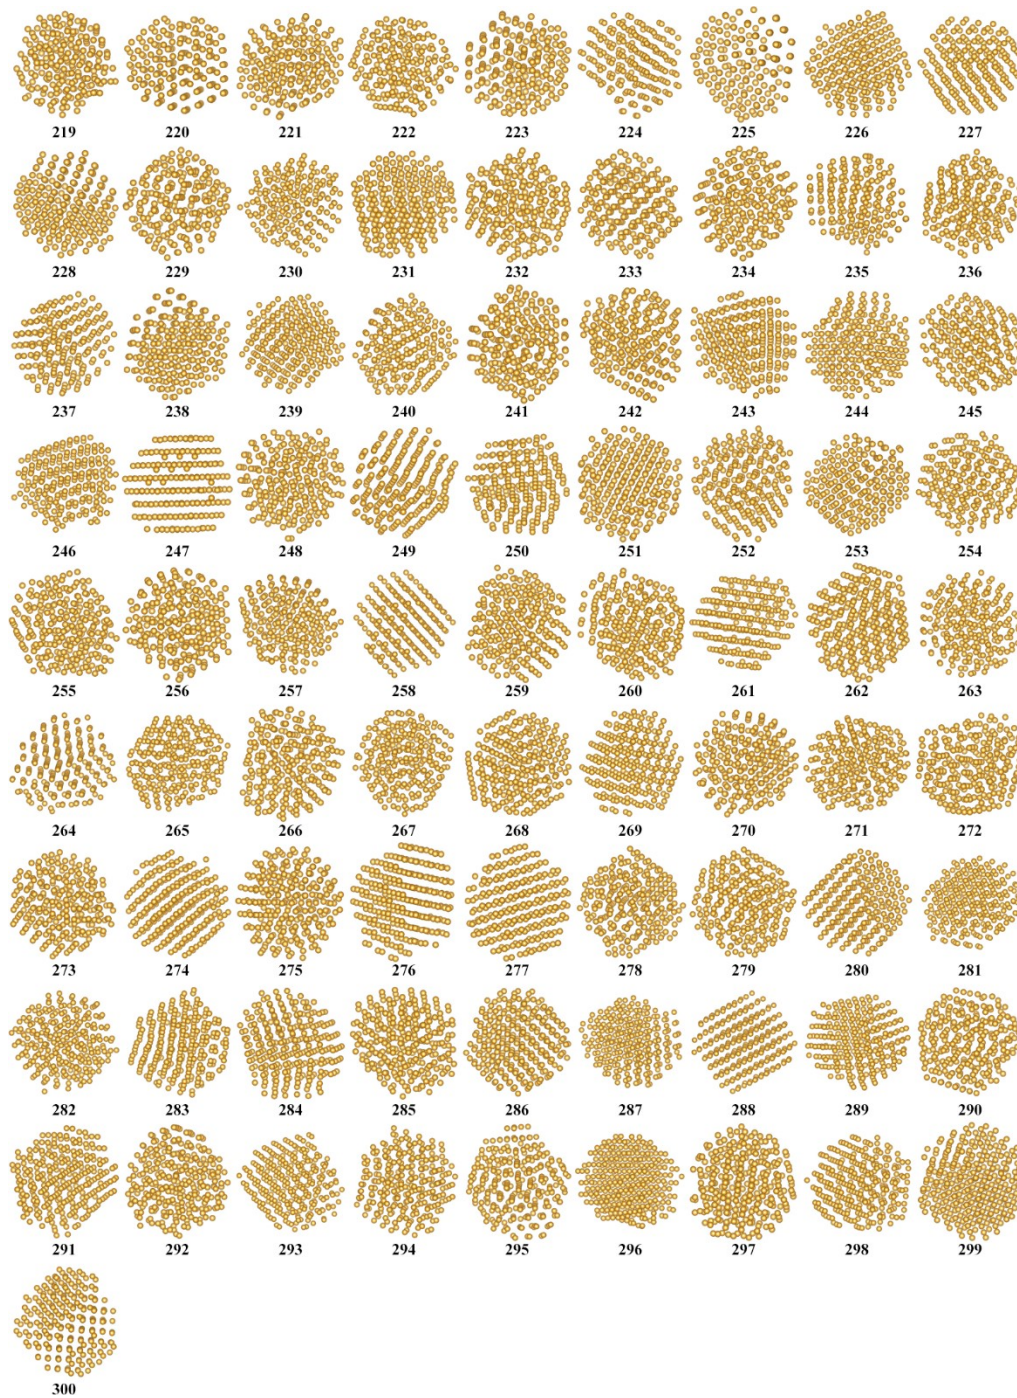

**Figure S2 (c).** Snapshots of structures of Au<sub>N</sub> cluster (N=219-300) obtained by RPSO.

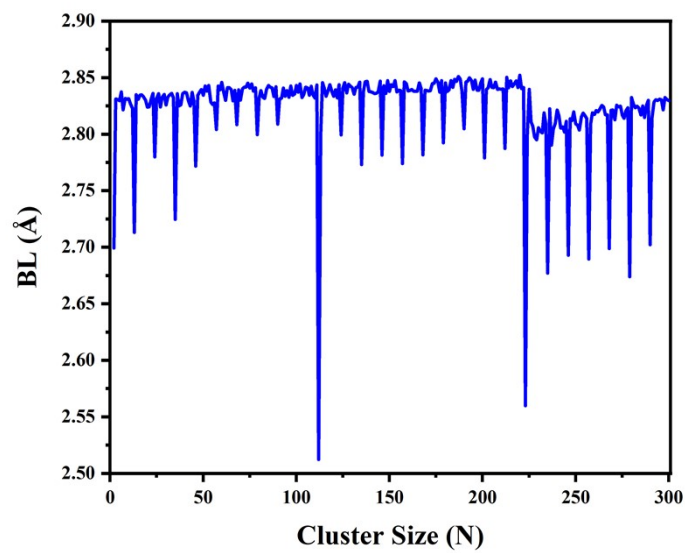

**Figure S3.** Average bond length for  $\text{Au}_N(2-300)$  clusters obtained by RPSO.

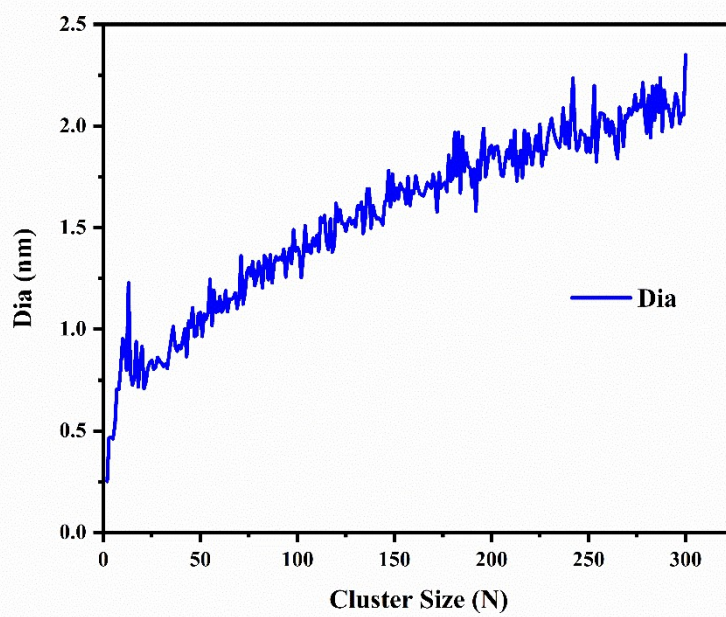

**Figure S4.** Dia (effective diameters) of  $\text{Au}_N$  ( $N=2-300$ ) obtained by RPSO.

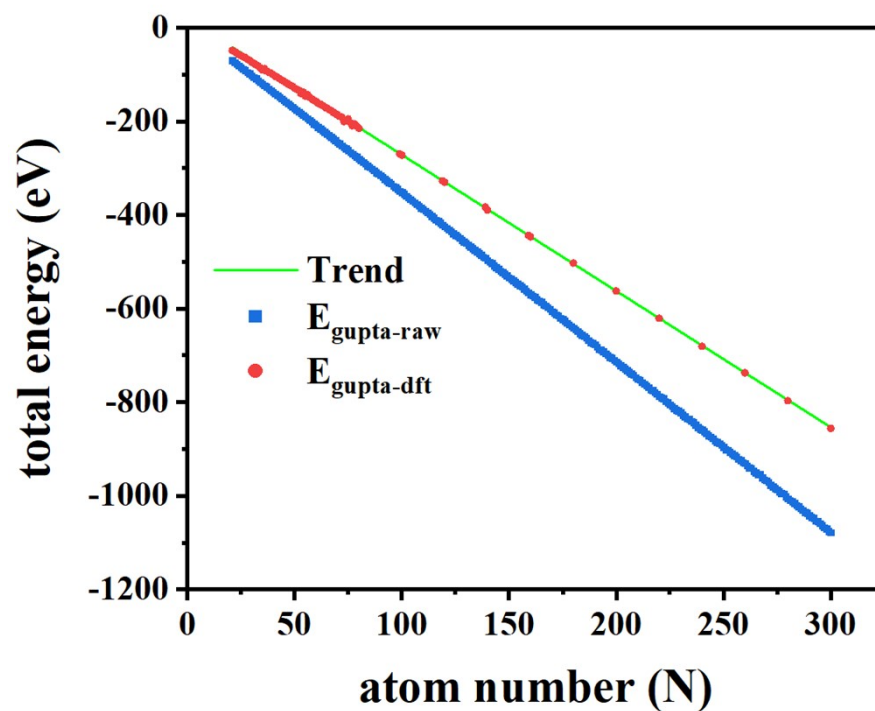

**Figure S5.** Schematic diagram of system energy correction. Blue square ( $E_{\text{gupta-raw}}$ ) means the original energy of  $\text{Au}_N$  ( $N=2-300$ ) obtained by RPSO at the Gupta level. The red dot ( $E_{\text{gupta-dft}}$ ) means recalculated energy data point of the same structural configurations using VASP, selected  $\text{Au}_N$  scatter size is 21-80, 99, 100, 119, 120, 139, 140, 159, 160, 200, 220, 240, 260, 280, 300. The green trend line reflects the revised system energy trend.

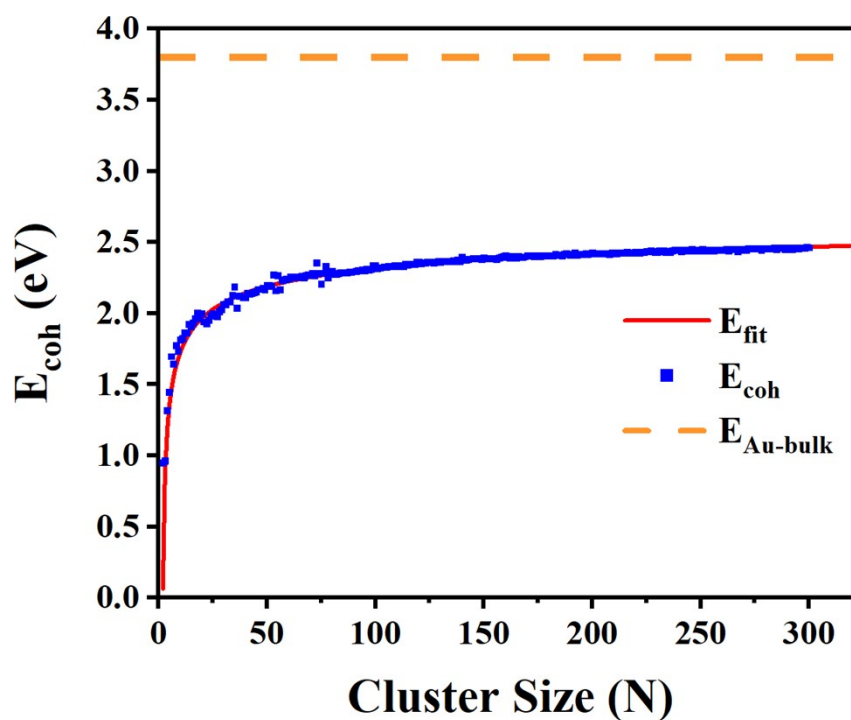

**Figure S6.** Cohesive energy of  $\text{Au}_N$  ( $N=2-300$ ). Horizontal dashed line represents the experimental cohesive energy of bulk gold, which is  $3.8 \text{ eV}^2$ .

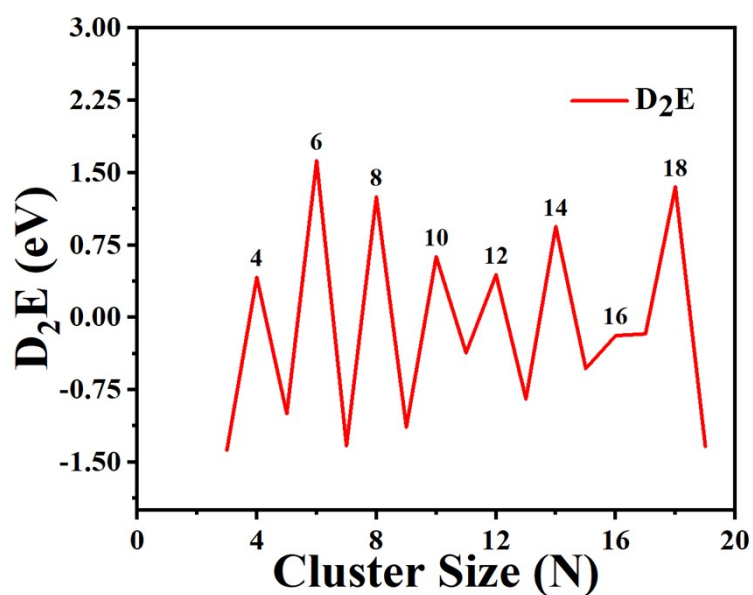

**Figure S7.**  $D_2E$  (Second finite difference) of  $Au_N$  ( $N=2-20$ ). Black label numbers correspond to more stable sizes.

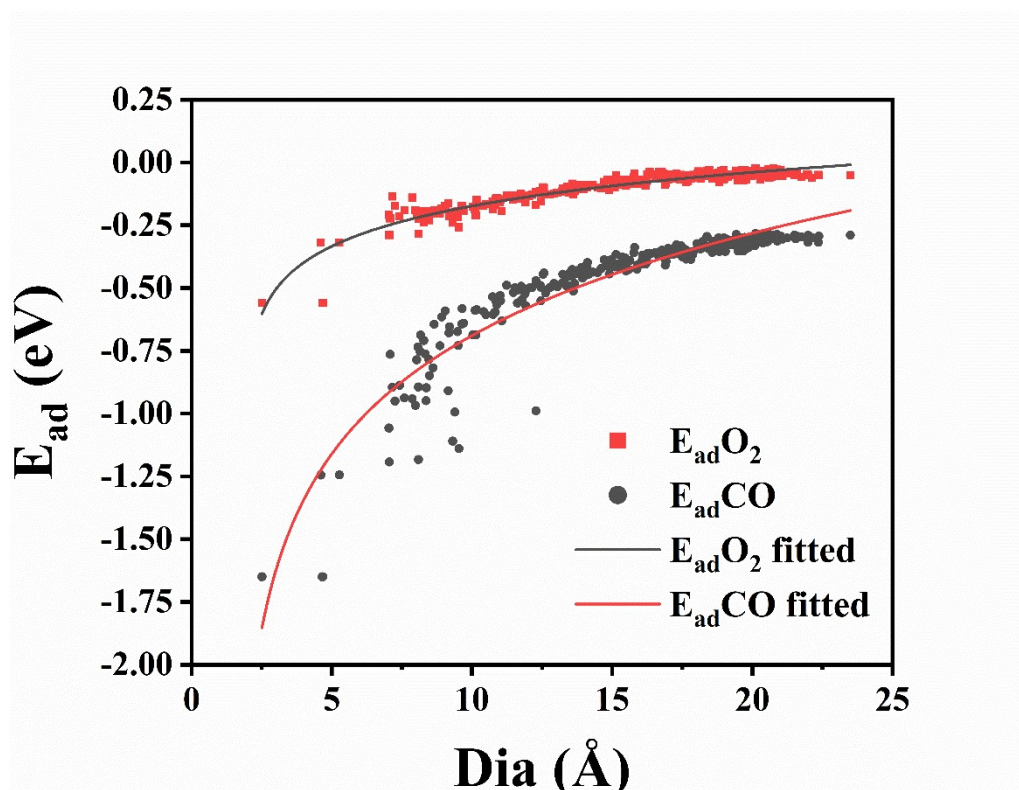

**Figure S8.** Average adsorption energy of CO oxidation upon  $Au_N$  cluster with effect diameter denoted as Dia. Red dot represents adsorption energy of CO, which follows linear logarithmic relationship as  $y = -1.793 + 0.519 \ln(x - 1.623)$  with  $R^2 = 0.88$ . Black dot represents adsorption energy of molecular  $O_2$ , which follows linear logarithmic relationship as  $y = -0.523 + 0.167 \ln(x - 1.887)$  with  $R^2 = 0.88$ .



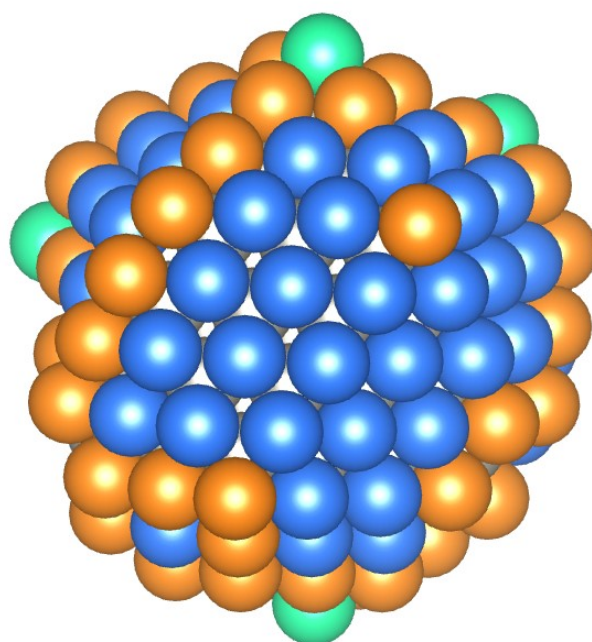

**Figure S9.** Schematic diagram of geometric site distribution using Au<sub>199</sub> as a demo system. Blue atoms denote *Face* sites, orange atoms denote *Edge* sites, and green atoms denote *Kink* sites.

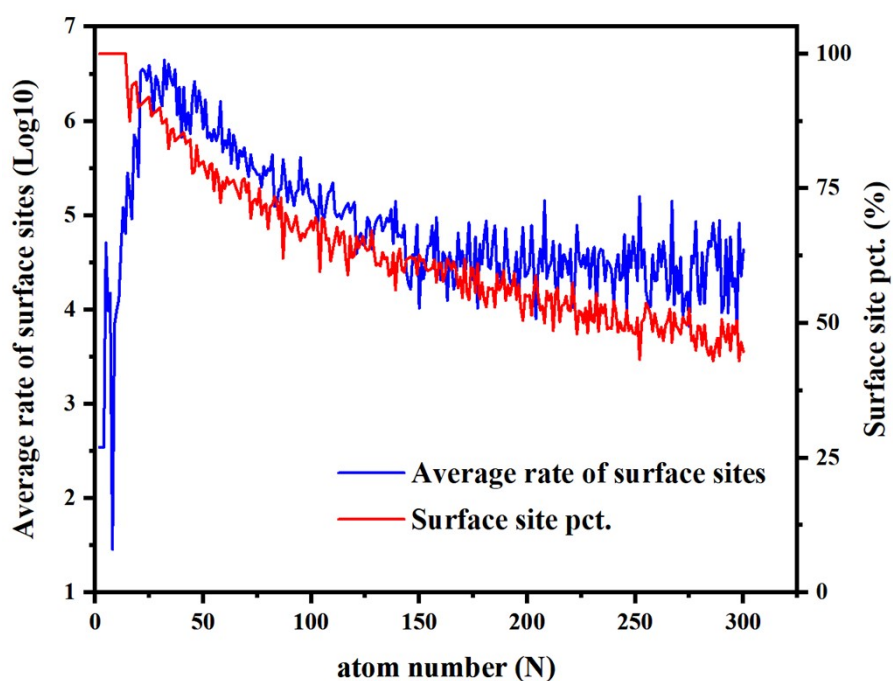

**Figure S10.** Blue line: average predicted reaction rate of surface sites. Red line: percentage of surface sites to total number of atoms in cluster.

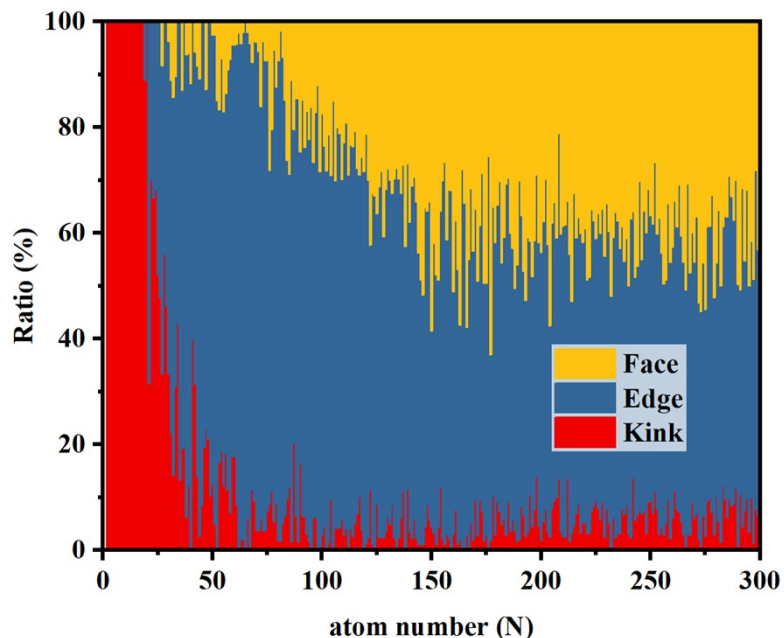

**Figure S11.** The ratio of different types of sites (*Kink*, *Edge* and *Face*) to the total number of surface sites.

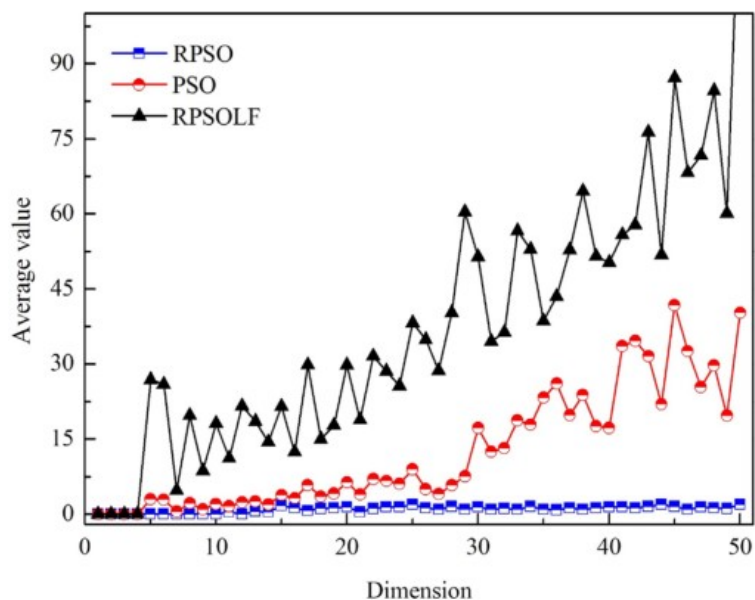

**Figure S12.** The comparison of RPSO, RPSOLF and PSO algorithms results for different dimensions of Rosenbrock function. Each point represents the mean values of the given dimension of the Rosenbrock function obtained by three algorithms starting from the same initial solution. Cited from ref [3].

## Reference

- (1) Tailoring of Pd-Pt Bimetallic Clusters with High Stability for Oxygen Reduction Reaction. Cheng D, Wang W.
- (2) Assadollahzadeh, B.; Schwerdtfeger, P. A Systematic Search for Minimum Structures of Small Gold Clusters Au<sub>n</sub> (N=2–20) and Their Electronic Properties. *The Journal of Chemical Physics* **2009**, *131* (6), 064306.
- (3) Zhou, Y.; Zhao, Z.; Cheng, D. Cluster Structure Prediction via Revised Particle-Swarm Optimization Algorithm. *Computer Physics Communications* **2020**, *247*, 106945.
